# Supplementary material for: Radiogenomic signatures reveal multiscale intratumour heterogeneity associated with biological functions and survival in breast cancer
Source: PubMed Central journal article supplement (PMC7519071; doi:10.1038/s41467-020-18703-2), 2020-09-25
Supplement: 41467_2020_18703_MOESM1_ESM.pdf [file 41467_2020_18703_MOESM1_ESM.pdf]

Radiogenomic signatures reveal multiscale intratumour heterogeneity  
associated with biological functions and survival in breast cancer

Fan et al.

**Supplementary Table 1.** Pathway analysis for the subclone-specific marker genes

| Term                                        | P-Value         | Corrected P     |
|---------------------------------------------|-----------------|-----------------|
| <b>Subclone 1</b>                           |                 |                 |
| <b>Cell cycle</b>                           | <b>2.45E-12</b> | <b>1.45E-10</b> |
| DNA replication                             | 1.11E-08        | 3.28E-07        |
| Progesterone-mediated oocyte maturation     | 1.19E-06        | 2.34E-05        |
| Oocyte meiosis                              | 3.48E-06        | 5.13E-05        |
| p53 signaling pathway                       | 0.000296        | 0.003497        |
| Mismatch repair                             | 0.000915        | 0.008167        |
| Pyrimidine metabolism                       | 0.000969        | 0.008167        |
| Alanine, aspartate and glutamate metabolism | 0.002004        | 0.014201        |
| Apoptosis                                   | 0.002166        | 0.014201        |
| Hepatitis B                                 | 0.002434        | 0.014361        |
| Nucleotide excision repair                  | 0.00349         | 0.018719        |
| Fanconi anemia pathway                      | 0.004693        | 0.023074        |
| Small cell lung cancer                      | 0.010863        | 0.042706        |
| Gap junction                                | 0.01134         | 0.042706        |
| HTLV-I infection                            | 0.011574        | 0.042706        |
| Ribosome biogenesis in eukaryotes           | 0.011581        | 0.042706        |
| <b>Subclone 2</b>                           |                 |                 |
| <b>Alzheimer's disease</b>                  | 0.000196488     | 0.017880403     |
| Nicotinate and nicotinamide metabolism      | 0.001299193     | 0.032920243     |
| Oxidative phosphorylation                   | 0.001522983     | 0.032920243     |
| Apoptosis                                   | 0.00175785      | 0.032920243     |
| Parkinson's disease                         | 0.001828869     | 0.032920243     |
| Non-alcoholic fatty liver disease (NAFLD)   | 0.002170565     | 0.032920243     |
| Amyotrophic lateral sclerosis (ALS)         | 0.003529475     | 0.03602332      |
| Endometrial cancer                          | 0.00366132      | 0.03602332      |
| Non-small cell lung cancer                  | 0.004211341     | 0.03602332      |
| Huntington's disease                        | 0.004277433     | 0.03602332      |
| Acute myeloid leukemia                      | 0.004354467     | 0.03602332      |
| VEGF signaling pathway                      | 0.004949232     | 0.037531672     |
| Melanoma                                    | 0.006589326     | 0.045130346     |
| Chronic myeloid leukemia                    | 0.00694313      | 0.045130346     |
| <b>Subclone 3</b>                           |                 |                 |
| <b>Peroxisome</b>                           | 1.55E-05        | 0.001057        |
| Prostate cancer                             | 0.000536        | 0.011752        |
| Pathways in cancer                          | 0.000632        | 0.011752        |
| Vitamin digestion and absorption            | 0.000909        | 0.011752        |
| Metabolic pathways                          | 0.00129         | 0.011752        |

|                                            |          |          |
|--------------------------------------------|----------|----------|
| Oocyte meiosis                             | 0.001333 | 0.011752 |
| Mucin type O-Glycan biosynthesis           | 0.001466 | 0.011752 |
| beta-Alanine metabolism                    | 0.001466 | 0.011752 |
| Propanoate metabolism                      | 0.001555 | 0.011752 |
| Wnt signaling pathway                      | 0.002031 | 0.013814 |
| Hedgehog signaling pathway                 | 0.003207 | 0.01891  |
| Valine, leucine and isoleucine degradation | 0.003337 | 0.01891  |
| Basal cell carcinoma                       | 0.004315 | 0.022417 |
| Staphylococcus aureus infection            | 0.004615 | 0.022417 |
| Pertussis                                  | 0.007738 | 0.03508  |
| Complement and coagulation cascades        | 0.008531 | 0.036258 |
| HTLV-I infection                           | 0.010297 | 0.041189 |

---

#### Subclone 4

|                                                        |          |          |
|--------------------------------------------------------|----------|----------|
| <b>ECM-receptor interaction</b>                        | 8.77E-05 | 0.003509 |
| Focal adhesion                                         | 0.001172 | 0.023447 |
| Arrhythmogenic right ventricular cardiomyopathy (ARVC) | 0.002678 | 0.031149 |
| Hypertrophic cardiomyopathy (HCM)                      | 0.003335 | 0.031149 |
| Dilated cardiomyopathy                                 | 0.003894 | 0.031149 |
| PI3K-Akt signaling pathway                             | 0.005032 | 0.033543 |

---

#### Subclone 5

|                                                  |          |          |
|--------------------------------------------------|----------|----------|
| <b>Cholinergic synapse</b>                       | 0.00026  | 0.010569 |
| Neurotrophin signaling pathway                   | 0.000325 | 0.010569 |
| Oocyte meiosis                                   | 0.000348 | 0.010569 |
| cGMP-PKG signaling pathway                       | 0.000833 | 0.018955 |
| Regulation of lipolysis in adipocytes            | 0.001813 | 0.024216 |
| Longevity regulating pathway - multiple species  | 0.00234  | 0.024216 |
| Long-term potentiation                           | 0.002482 | 0.024216 |
| Thyroid hormone synthesis                        | 0.002854 | 0.024216 |
| Gastric acid secretion                           | 0.003088 | 0.024216 |
| Aldosterone synthesis and secretion              | 0.00367  | 0.024216 |
| Gap junction                                     | 0.004299 | 0.024216 |
| Salivary secretion                               | 0.004392 | 0.024216 |
| GnRH signaling pathway                           | 0.004582 | 0.024216 |
| Longevity regulating pathway                     | 0.004874 | 0.024216 |
| Circadian entrainment                            | 0.004973 | 0.024216 |
| Pancreatic secretion                             | 0.005074 | 0.024216 |
| Endocrine resistance                             | 0.005175 | 0.024216 |
| Inflammatory mediator regulation of TRP channels | 0.005277 | 0.024216 |
| Progesterone-mediated oocyte maturation          | 0.005277 | 0.024216 |
| Estrogen signaling pathway                       | 0.00538  | 0.024216 |

|                                        |          |          |
|----------------------------------------|----------|----------|
| Retrograde endocannabinoid signaling   | 0.005588 | 0.024216 |
| Glutamatergic synapse                  | 0.007033 | 0.029091 |
| Vascular smooth muscle contraction     | 0.007751 | 0.030323 |
| Platelet activation                    | 0.007997 | 0.030323 |
| Apoptosis                              | 0.010371 | 0.037749 |
| Adrenergic signaling in cardiomyocytes | 0.01166  | 0.040811 |
| Oxytocin signaling pathway             | 0.013017 | 0.043871 |
| Alzheimer's disease                    | 0.0146   | 0.047451 |

---

**Subclone 6**

|                                           |          |          |
|-------------------------------------------|----------|----------|
| Primary immunodeficiency                  | 1.19E-10 | 5.13E-09 |
| Hematopoietic cell lineage                | 7.11E-09 | 1.53E-07 |
| Measles                                   | 3.26E-06 | 4.67E-05 |
| HTLV-I infection                          | 3.89E-05 | 0.000365 |
| Cytokine-cytokine receptor interaction    | 4.25E-05 | 0.000365 |
| T cell receptor signaling pathway         | 6.75E-05 | 0.000484 |
| Natural killer cell mediated cytotoxicity | 0.00014  | 0.000858 |
| Jak-STAT signaling pathway                | 0.00022  | 0.001182 |
| B cell receptor signaling pathway         | 0.001377 | 0.00658  |
| PI3K-Akt signaling pathway                | 0.001998 | 0.008584 |
| Fc gamma R-mediated phagocytosis          | 0.002196 | 0.008584 |
| Chagas disease (American trypanosomiasis) | 0.002723 | 0.009759 |
| Cell adhesion molecules (CAMs)            | 0.005224 | 0.017278 |
| Endocytosis                               | 0.0156   | 0.047913 |

---

**Subclone 7**

|                                  |          |          |
|----------------------------------|----------|----------|
| Protein digestion and absorption | 2.74E-05 | 0.000411 |
| Nitrogen metabolism              | 6.44E-05 | 0.000483 |

Note: Corrected p values less than 0.05 are shown. Statistical significance was assessed by the two-sided hypergeometric test. *p* values were adjusted for multiple comparisons using Benjamini-Hochberg method.

**Supplementary Table 2.** Imaging features in multivariate predictive model for subclone compositions

| Tumour                             | Tumour surrounding Pachynema     |
|------------------------------------|----------------------------------|
| Entropy <sup>1</sup>               | Maximum <sup>1</sup>             |
| Minimum <sup>3</sup>               | Maximum Probability <sup>1</sup> |
| Correlation <sup>1</sup>           | Contrast <sup>2</sup>            |
| Entropy <sup>2</sup>               | Surface Area/Volume              |
| Sum Entropy <sup>2</sup>           | Mean Radius of Lesion            |
| Maximum Probability <sup>1</sup>   | Compactness <sup>1</sup>         |
| Surface Area/Volume                |                                  |
| Maximum Lesion Radius <sup>1</sup> |                                  |
| Compactness <sup>1</sup>           |                                  |

<sup>1</sup>precontrast image

<sup>2</sup>image subtractions between postcontrast image series and precontrast series

<sup>3</sup>image subtractions between late postcontrast and precontrast series

**Supplementary Table 3. Demographic and clinical data of the study dataset**

| Parameter                 | Genomic development dataset (n =660) | Genomic validation dataset (n =329) | Radiogenomic dataset (n =87) | Prognostic assessment (n=173) | Prognostic validation (n=61) |
|---------------------------|--------------------------------------|-------------------------------------|------------------------------|-------------------------------|------------------------------|
| <b>Age (y)</b>            |                                      |                                     |                              |                               |                              |
| Median                    | 59 (26-90)                           | 58 (26-90)                          | 53 (29-82)                   | 47.8 (26.7-68.8)              | 48 (29.7-72.4)               |
| Mean ± STD                | 58.7±12.9                            | 58.7±13.9                           | 53.3±11.5                    | 47.7± 8.8                     | 48.1±9.8                     |
| <b>Race</b>               |                                      |                                     |                              |                               |                              |
| Asian                     | 45 (7)                               | 14 (4)                              | 0                            | 7 (4)                         | 3 (5)                        |
| Black or African American | 118 (18)                             | 59 (18)                             | 4 (5)                        | 30 (17)                       | 3 (5)                        |
| White                     | 442 (67)                             | 227 (69)                            | 82 (94)                      | 135 (78)                      | 47 (77)                      |
| Unknown or others         | 55 (8)                               | 29 (9)                              | 1 (1)                        | 1 (1)                         | 8 (13)                       |
| <b>ER</b>                 |                                      |                                     |                              |                               |                              |
| Positive                  | 476 (72)                             | 240 (73)                            | 75 (86)                      | 97 (56)                       | 28 (46)                      |
| Negative                  | 147 (22)                             | 78 (24)                             | 12 (14)                      | 74 (43)                       | 20 (33)                      |
| Indeterminate             | 1 (0)                                | 1 (0)                               | 0                            | 0 (0)                         | 0                            |
| Unknown                   | 36 (6)                               | 10 (3)                              | 0                            | 2 (1)                         | 13 (21)                      |
| <b>PR</b>                 |                                      |                                     |                              |                               |                              |
| Positive                  | 411 (62)                             | 206 (63)                            | 69 (79)                      | 81 (47)                       | 22 (36)                      |
| Negative                  | 210 (32)                             | 111 (34)                            | 18 (21)                      | 90 (52)                       | 26 (43)                      |
| Indeterminate             | 2 (0)                                | 2 (0)                               | 0                            | 0 (0)                         | 0                            |
| Unknown                   | 37 (6)                               | 10 (3)                              | 0                            | 2 (1)                         | 13 (21)                      |
| <b>HER2</b>               |                                      |                                     |                              |                               |                              |
| Positive                  | 101 (15)                             | 44 (13)                             | 15 (17)                      | 102 (59)                      | 14 (23)                      |
| Negative                  | 329 (50)                             | 177 (54)                            | 46 (53)                      | 69 (40)                       | 31 (51)                      |
| Equivocal                 | 100 (15)                             | 59 (18)                             | 19 (22)                      | 0 (0)                         | 0                            |
| Unknown                   | 130 (20)                             | 49 (15)                             | 7 (8)                        | 2 (1)                         | 16 (26)                      |
| <b>Histologic type</b>    |                                      |                                     |                              |                               |                              |
| IDC                       | 465 (70)                             | 228 (69)                            | 75 (86)                      | N/A                           | 37 (60)                      |
| ILC                       | 118 (18)                             | 74 (23)                             | 10 (12)                      | N/A                           | 12 (20)                      |
| Other                     | 77 (12)                              | 26 (8)                              | 2 (2)                        | N/A                           | 12 (20)                      |
| Unknown                   | 0 (0)                                | 1 (0)                               | 0                            | N/A                           | 0                            |
| <b>Surgery type</b>       |                                      |                                     |                              |                               |                              |
| Lumpectomy                | 147 (22)                             | 76 (23)                             | 22 (25)                      | N/A                           | 27 (44)                      |
| Mastectomy                | 316 (48)                             | 172 (53)                            | 30 (35)                      | N/A                           | 34 (56)                      |
| Other                     | 157 (24)                             | 67 (20)                             | 35 (40)                      | N/A                           | 0                            |
| Unknown                   | 40 (6)                               | 14 (4)                              | 0                            | N/A                           | 0                            |
| <b>Follow-up (y)</b>      |                                      |                                     |                              |                               |                              |
| Median                    | 2.20 (0.03-23.58)                    | 2.22 (0.01-22.99)                   | 3.93 (0.37-9.40)             | 3.91 (0.51-6.76)              | 5.39 (0.28-9.84)             |
| Mean ± STD                | 3.40±3.34                            | 3.39±2.25                           | 3.99±2.22                    | 3.85±1.46                     | 4.77±2.749                   |
| <b>Recurrence</b>         |                                      |                                     |                              |                               |                              |
| Event                     | N/A                                  | N/A                                 | N/A                          | 49 (28)                       | 23 (38)                      |
| No Event                  | N/A                                  | N/A                                 | N/A                          | 124 (72)                      | 38 (62)                      |
| Unknown                   | N/A                                  | N/A                                 | N/A                          | 0 (0)                         | 0                            |
| <b>Death</b>              |                                      |                                     |                              |                               |                              |
| Event                     | 101 (15)                             | 50 (15)                             | 1 (1)                        | 32 (18)                       | N/A                          |
| No Event                  | 559 (85)                             | 279 (85)                            | 86 (99)                      | 138 (80)                      | N/A                          |
| Unknown                   | 0                                    | 0                                   | 0                            | 3 (2)                         | N/A                          |

ER=Oestrogen receptor; PR=Progesterone receptor; HER2=Human epidermal growth factor receptor; IDC= Infiltrating ductal carcinoma; ILC= Infiltrating lobular carcinoma; N/A=Not applicable

**Supplementary Table 4.** Imaging feature description

| Feature class                 | Feature description                                                                                                                                                                                                                                                                                                             |
|-------------------------------|---------------------------------------------------------------------------------------------------------------------------------------------------------------------------------------------------------------------------------------------------------------------------------------------------------------------------------|
| Histogram distribution (n=10) | Mean, Standard Deviation, Kurtosis, Skewness, Maximum, Minimum, Median, Interquartile Range, Range, Entropy                                                                                                                                                                                                                     |
| Texture GLCM (n=19)           | Energy, Contrast, Correlation, Sum of Squares Variance, Homogeneity, Sum Average, Sum Variance, Sum Entropy, Entropy, Difference Variance, Difference Entropy, Information Correlation 1, Information Correlation 2, Autocorrelation, Dissimilarity, Cluster Shade, Cluster Prominence, Maximum Probability, Inverse Difference |
| Morphologic (n=10)            | Volume, Eccentricity, Surface Area, Compactness, Maximum Lesion Radius, Mean Radius of the Lesion, Radius of the Sphere, Compactness 1, Compactness 2, Surface Area/Volume                                                                                                                                                      |

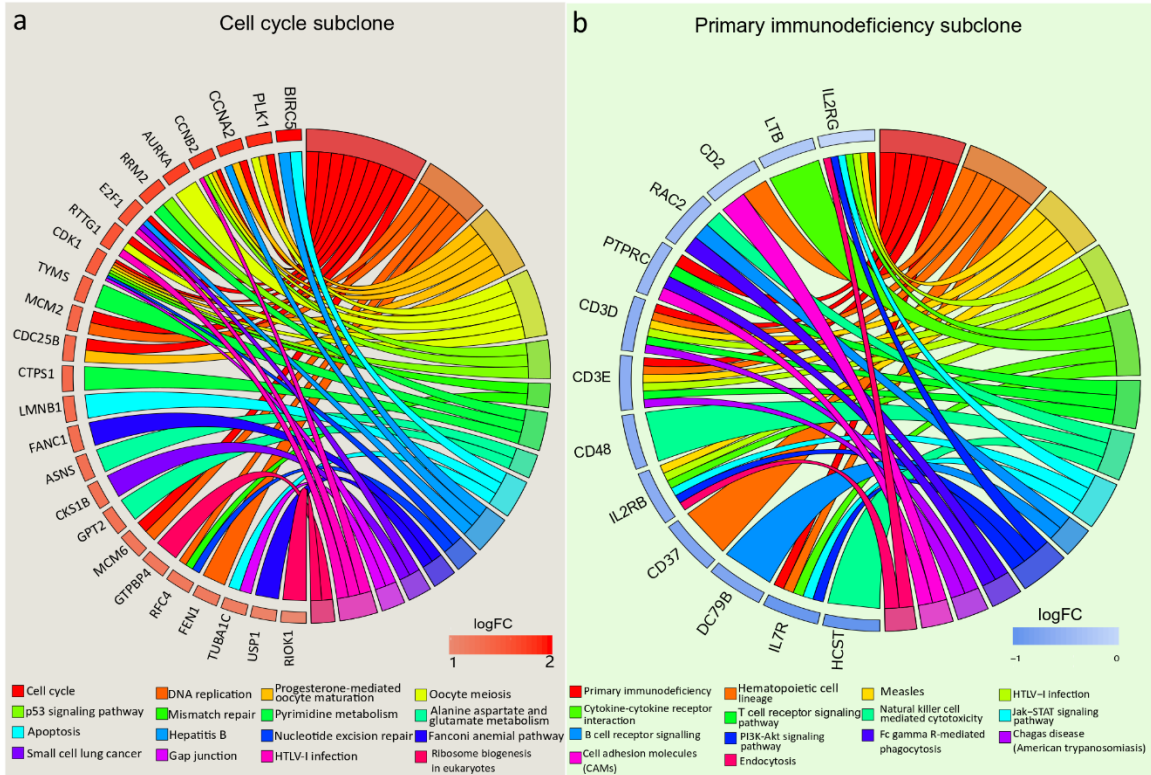

**Supplementary Figure 1.** Illustration of differentially expressed genes of subclones between the poor-survival and good-survival groups. Correlations among genes and corresponding biological functions for the **a)** ‘cell cycle’ and **b)** ‘primary immunodeficiency’ subclones are illustrated. Source data are provided as a Source data file.



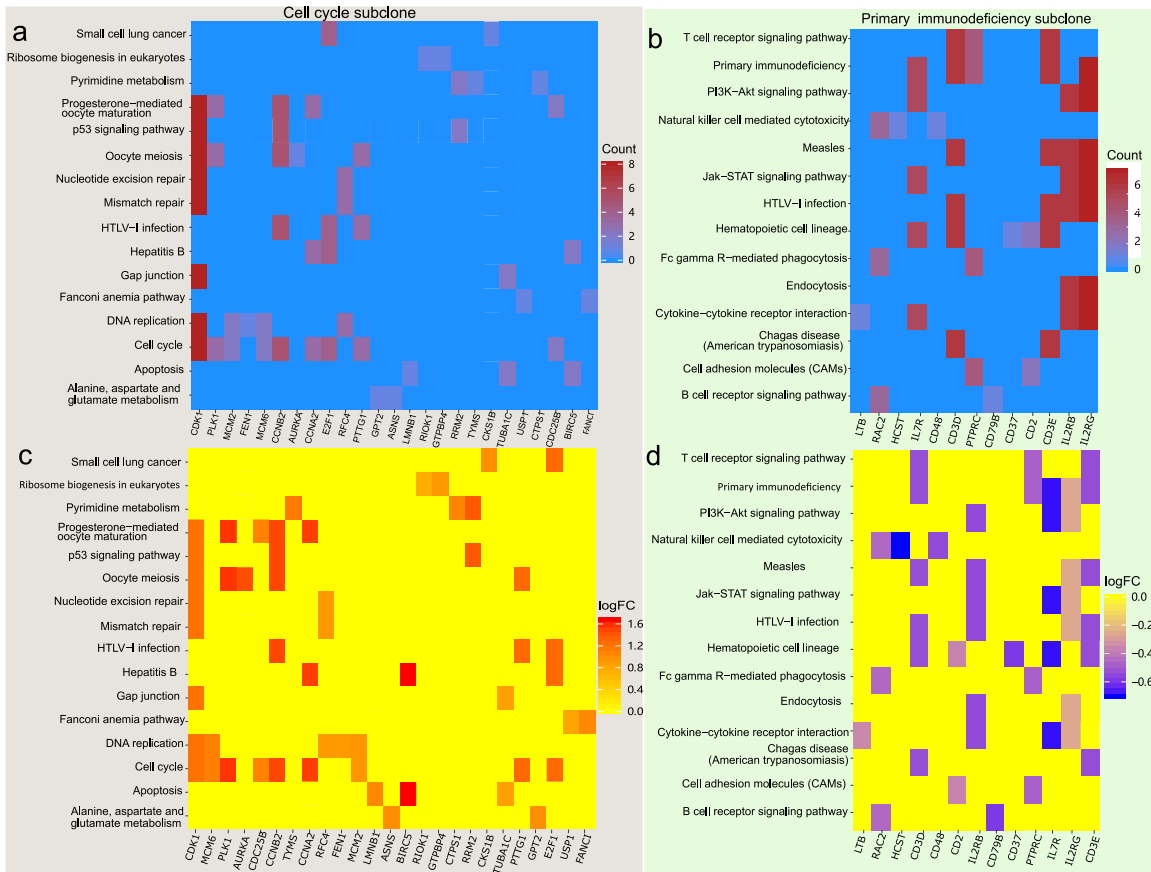

**Supplementary Figure 2.** Heatmap showing the relationship between genes (columns) and biological functions (rows). The colour of each cell represents the overall number of biological functions for the **a)** ‘cell cycle’ and **b)** ‘primary immunodeficiency’ subclones. The colour also reflects the logFC values for the **c)** ‘cell cycle’ and **d)** ‘primary immunodeficiency’ subclones. Source data are provided as a Source data file.
